# Supplementary material for: Facile synthesis and phase transition of V2O3 nanobelts
Source: Royal Society of Chemistry journal article supplement (doi:10.1039/c4ra13707h), 2015-01-01
Supplement: c4ra13707h1.pdf [file c4ra13707h1.pdf]

COMMUNICATION

**Facile Synthesis and Phase Transition of  $V_2O_3$  Nanobelts**

**Guanchen Xu<sup>[a],[b]</sup>, Xinsheng Wang<sup>[b]</sup>, Xiao Chen<sup>[a],\*</sup> and Liying Jiao<sup>[b],\*</sup>**

**Experimental details and discussion**

**1. Synthesis of  $V_2O_5$  nanobelts**

0.75 mmol of ammonium metavanadate ( $NH_4VO_3$ ), 40 mL of deionized water, and 3 mL of  $H_2O_2$  (30 wt %) were mixed and stirred to dissolve the solid powder completely. The obtained solution was sealed in a 100 mL Teflon vessel and heated at 220 °C for 24 h in an oven. The obtained products were centrifuged, washed with deionized water for three times, dried at 70 °C in air and collected for further use.

**2. Synthesis of  $V_2O_3$  nanobelts**

The dried  $V_2O_5$  nanobelts were dispersed in ethanol by brief sonication and then were spin-coated onto 300 nm  $SiO_2/Si$  substrates at 3000 r.p.m. for 1 min. Then the substrates were loaded into a home-built chemical vapor deposition (CVD) furnace with 1 inch quartz tube. After purging the system with Ar for 20 min, the furnace was heated up to 450 °C with 200 sccm Ar and 50 sccm  $H_2$ . When the temperature reached 450 °C, sulfur was heated by a heating belt with an individual temperature controller at ~150 °C. After 1 h, the heating belt for sulfur was removed immediately and the furnace was cooled to room temperature. The  $V_2O_3$  nanobelts can also be synthesized in bulk by using the as-collected  $V_2O_5$  nanobelts in powders as the starting materials under the same conditions as mentioned above.

**3. Device fabrication and variable- temperature electrical and magnetic measurements**

Source and drain electrodes were fabricated on  $V_2O_3$  nanobelts sitting on 300 nm  $SiO_2/Si$  substrates by electron-beam lithography followed by electron-beam evaporation of 5 nm Ti/50 nm Au. After the lift-off, the obtained devices were annealed in vacuum at 400 °C for 30 min. The variable-temperature electrical measurements were carried out in a cryogenic probe station (Janis ST-500) at a pressure of  $\sim 10^{-6}$  mbar with Agilent B1500A semiconductor parameter analyzer. VT-magnetic susceptibility was measured by

MPMS (SQUID) VSM with an applied magnetic field of 1T. The range of temperature was from 80 to 300 K.

#### 4. The magnetic properties of other vanadium oxide phases

For  $V_2O_5$ , there is no magnetism due to its zero magnetic moment. For  $VO_2$ , it was monoclinic below the transition temperature ( $T_c \sim 340$  K) and the  $V^{+4}$  ions tend to be V-V pairs and form covalent-type bonds. The V-V pairs shared the d electrons and therefore  $VO_2$  was diamagnetic below  $T_c$ . At above  $T_c$ ,  $VO_2$  was metallic and the V-V pairs were replaced by V-O pairs and form metallic bonds which may release the available d electrons.<sup>1</sup> So  $VO_2$  was paramagnetic above  $T_c$ .<sup>2</sup> For VO, the crystal structure of VO was like rock salt and had a large number of cation and anion vacancies. The stoichiometric ratio of VO was wide, extending over  $0.75 \leq x \leq 1.30$ .<sup>3</sup> The magnetic properties is related to the cation vacancies and temperature.<sup>4</sup>  $VO_x$  might be antiferromagnetic when  $x \geq 1.147$  and paramagnetic between 77 and 300 K.<sup>5</sup>

#### 5. Variable-temperature Raman spectroscopy measurements

VT-Raman spectra were collected with Horiba-Jobin-Yvon Raman system using 514 nm excitation with a laser power of 4 mW and the integration time was 20 s with 5 times accumulation. Raman mapping images were taken with a step of 0.8  $\mu m$  and the integration time was 0.8 s at each spot. The Si peak at 520  $cm^{-1}$  was used for calibration in the experiments.

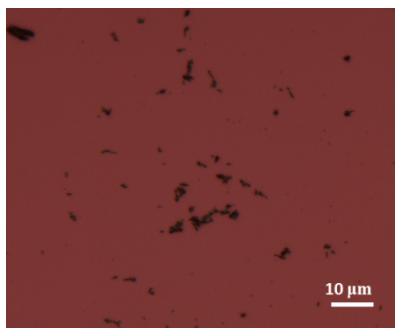

Fig. S1. Optical image of  $V_2O_3$  nanobelts prepared by reducing  $V_2O_5$  nanobelts with pure  $H_2$ .

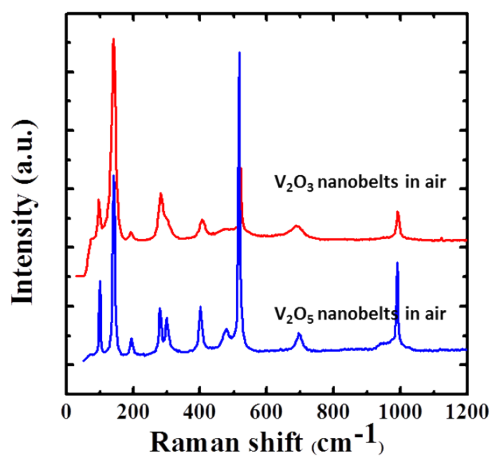

Fig. S2. Raman spectra of V<sub>2</sub>O<sub>3</sub> and V<sub>2</sub>O<sub>5</sub> nanobelts in air.

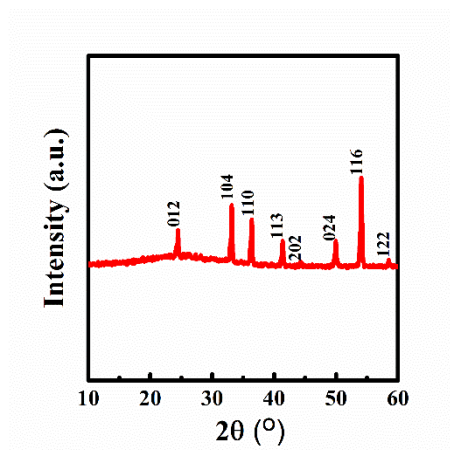

Fig. S3 XRD pattern of the commercially purchased V<sub>2</sub>O<sub>3</sub> powder. No other VO<sub>x</sub> phase was detected.

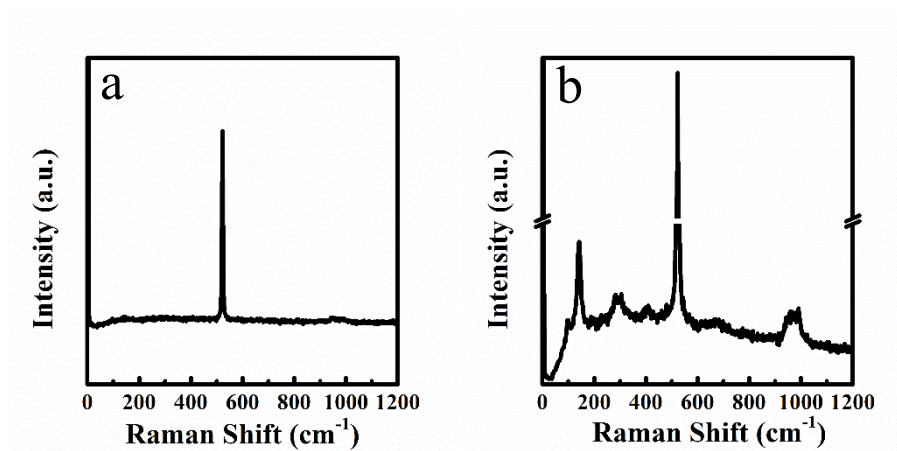

Fig. S4 Raman spectra of V<sub>2</sub>O<sub>3</sub> powders in vacuum (a) and in air (b). No Raman peak of V<sub>2</sub>O<sub>3</sub> appeared in vacuum and the typical peaks of V<sub>2</sub>O<sub>5</sub> were detected in air due to the oxidation of V<sub>2</sub>O<sub>3</sub>.

#### Reference

1. J. B. Goodenough, *Phys. Rev.*, 1960, **117**, 1442-1451.
2. K. Kosuge, *J. Phys. Soc. Jpn.*, 1967, **22**, 551-557.
3. M. D. Banus, T. B. Reed and A. J. Strauss, *Phys. Rev. B*, 1972, **5**, 2775-2784.
4. Goodenough, *Phys. Rev. B*, 1972, **5**, 2764-2774.
5. S. Kawano, K. Kosuge and S. Kachi, *J. Phys. Soc. Jpn.*, 1966, **21**, 2744-2745.
